# Supplementary material for: Sociodemographic Correlates and Prevalence of Modifiable Cardiovascular Disease Risk Factors Among University Students in North-Central Nigeria: A Cross-Sectional Study
Source: Research Square preprint supplement (doi:10.21203/rs.3.rs-8027940/v1), 2025-11-05
Supplement: Supplementary file 1 [file 1acb49dbd5c2f11ce9176de2.pdf]

# Demographic Disparities in CVD Risk Among Nigerian University Students

A cross-sectional analysis of 1,300 students from two universities in North-Central Nigeria

1,300

Students Enrolled

2

Universities

62.1%

Mean CVD Knowledge Score

22.6%

Good Knowledge (≥80%)

## Modifiable Risk Factor Prevalence (Low but Present)

2.2%

Current Smoking

3.7%

Alcohol Use

6.7%

Hypertension

1.4%

Diabetes

14.6%

Family History

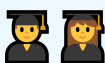

### Gender Disparities

-6.3%

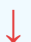

Males score lower than females in CVD knowledge (NSUK)

p=0.002

No difference in risk perception or behavioral intentions

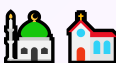

### Religious Influences (PARADOX)

-5.9%

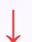

Muslims: Lower knowledge

p=0.008

+2.4%

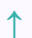

Muslims: Higher risk perception

p=0.007

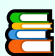

### Academic Level Paradox

-1.2%

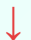

Per academic level increase in exercise intentions

p=0.003

Year 1: 81.1% → Year 5: 76.8% readiness

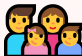

### High-Risk Subgroup

14.6%

Have family history of CVD

BUT only 56.9% recognize family history as a risk factor!

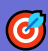

## Key Implications for Public Health Practice

One-size-fits-all CVD prevention is insufficient. Interventions must be: **gender-sensitive** (targeting male knowledge gaps), **culturally tailored** (faith-based partnerships with Muslims), **timing-optimized** (prioritize first-year students), and **risk-stratified** (systematic screening for family history).

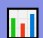

Knowledge correlates with intentions (r=0.23, p<0.001) but NOT risk perception (r=-0.02, p=0.499) → Dual-track interventions needed!
